# Supplementary material
Source: Elsevier journal article supplement (https://drewscherer.angelfire.com/MMC01.pdf)
Supplement: MMC01 [file MMC01.pdf]

County Fair Offers

\$500 for Horse Show

Prizes totalling \$500 will be distributed to horse owners at the County Fair Horse show at Rush Saturday, Sept. 6.

Mr. Caler has arranged 14 classes of the type most favored by horsemen of this area.

Class 1. Horsemanship, riders under 16 yrs. 1st, trophy; 2d, 3d, 4th ribbons.

Class 2. Novice jumpers: Over 3 ft. 6 in., \$10, \$5, and \$3.

Class 3. Colt class: Colts 3 yrs. and under to be shown as to age: Yearlings, 2 and 3 yrs. old.

Class 4. Road hack: \$10, \$5, \$3, and \$2.

Class 5. Open hunters: To be shown over 4 ft. jumps, 8 jumps to course. Prizes 40%, 30%, 20% and 10%.

Class 6. Pony class: Ridden by children 16 years and younger; \$10, \$5, \$3, and \$2.

Class 7. Mares suitable to become dams: \$5, \$3, and \$2.

Class 8. Ladies' horsemanship: 1st, trophy; 2d, 3d, and 4th ribbons.

Class 9. Open jumps: Over 4 ft. jumps to be raised in case of tie.

Class 10. Saddle horse over 15.2: \$10, \$5, \$3, and \$2.

Class 11. Amateur jumping: Over 3 ft. 6 in., ridden by amateur. \$15, \$10, \$3, and \$2.

Class 12. Saddle horse under 15.2: \$10, \$5, \$3, and \$2.

Class 13. Knock down and out: Started at 4 ft., 40%, 30%, 20% and 10%.

Class 14. Western class: Horse and rider to be fully equipped with eastern outfit. \$10, \$5, \$3, and \$2.

The grandstand which will be erected south of the horse show arena will seat 1500 people.

Call for Trainees For National Defense

Wanted, 1000 men and women to train for national defense work!

The officiating clergyman was the well known Robert Whiffletree whose present address is Washington, D. C.

As the bridal party took their place under an arch of roses the wedding march was beautifully rendered by Laura Paderwoosky.

The bride wore a gown of white mousseline-de-soupy and her veil was an heirloom having been worn by Cleopatra of Egypt.

The bride carried an arm bouquet of petunias. The bride's maid, Augusta Rose-in-bloom, a friend of the bride, looked equally charming in pink-crepe sewing machine and carried an arm bouquet of old-fashioned flowers.

A prenuptial event was a shower on Saturday which the farmers said did their crops much good.

After a wedding trip to the hot dog stand Mr. and Mrs. Dewdrop are at home to their many friends.

State Fair Purses Big

Six afternoons of grand circuit harness horse races, carrying more than \$30,000 in purses, will be staged at the New York State Fair, Syracuse, Aug. 24th-Sept. 1st.

National defense training classes are sponsored by the Rochester board of education, in cooperation with New York State Employment service, and financed by the United States government.

Anyone interested in joining a national defense training class can obtain full particulars by calling at the board of education building, 13 South Fitzhugh street, Rochester, (room and Saturdays from 9 a. m. to 12:30 p. m. from 9:00 a. m. to 4:30 p. m. daily and Saturdays from 9:00 a. m. to 12:00.

Reed Family Reunion

The 20th annual reunion of the Reed family was held Aug. 17 at the home of Mr. and Mrs. Jay Staley of Fairport.

The gathering enjoyed a bountiful picnic dinner followed by a business meeting at which the vice president, Theo. Pearson, presided.

The secretary and treasurer's reports were read and accepted. One birth, Harold Freeland, son of Mr. and Mrs. Clarence Freeland of Palmyra, was reported.

The following officers were elected for the coming year: President, Theo Pearson of Palmyra; vice president, Sam Aldrich of Rochester; secretary, Eleanor Reed of Macedon; treasurer, Elberta Reed of Macedon; sport committee, Eleanor Reed and Reed Staley of Fairport; table arrangement, Clarence Freeland and Theo. Pearson.

The reunion for the coming year will be held at the home of Mr. and Mrs. Clarence Freeland of Palmyra.

A rising vote of thanks was given to Mr. and Mrs. Jay Staley for their hospitality. Prizes were given to the oldest member present, John Reed of East Rochester, and to the youngest member, Harold Freeland of Palmyra.

Games and sports were enjoyed by all in the afternoon.

Among a gathering of about fifty friends and neighbors one of the most outstanding weddings and social events of the season took place Aug. 17 at Crabtree Corners (apologies to Li' Abner and Al Capp) when the petite and charming Miss Francena Dewdrop became the blushing bride of Mr. Dempsey Dewdrop.

The officiating clergyman was the well known Robert Whiffletree whose present address is Washington, D. C.

As the bridal party took their place under an arch of roses the wedding march was beautifully rendered by Laura Paderwoosky.

The bride wore a gown of white mousseline-de-soupy and her veil was an heirloom having been worn by Cleopatra of Egypt.

The bride carried an arm bouquet of petunias. The bride's maid, Augusta Rose-in-bloom, a friend of the bride, looked equally charming in pink-crepe sewing machine and carried an arm bouquet of old-fashioned flowers.

A prenuptial event was a shower on Saturday which the farmers said did their crops much good.

After a wedding trip to the hot dog stand Mr. and Mrs. Dewdrop are at home to their many friends.

State Fair Purses Big

Six afternoons of grand circuit harness horse races, carrying more than \$30,000 in purses, will be staged at the New York State Fair, Syracuse, Aug. 24th-Sept. 1st.

National defense training classes are sponsored by the Rochester board of education, in cooperation with New York State Employment service, and financed by the United States government.

CHURCHES

CHURCH OF THE ASSUMPTION Roman Catholic, Fairport Rev. James T. Wood, Pastor Rev. F. Crisantielli, Assistant Sunday masses 7:00, 8:30, 10:30. Week day mass 7:30.

EVERYBODY'S TABERNACLE Macedon "Where Hungry Hearts are Fed" Sunday school 10 a. m., morning service 11:00, young people's service 7 p. m., evening service 8 o'clock. Radio program, WSAY, 9:15 a. m. Sunday, 11:15 p. m. Wednesday.

FAIRPORT METHODIST Lincoln G. Archer, Pastor Sunday morning worship at 10:30. Members of the First Baptist congregation are uniting with us for this service. Rev. Burton L. Taylor of Rochester will be the guest preacher. Sunday, August 31, the services will be in charge of Arthur E. Basile of the Colgate-Rochester Divinity school.

W. WALWORTH EVANGELICAL J. W. Schober, Pastor Church school at 10 o'clock with classes for every age. Morning worship at 11 o'clock. Let us remember God in corporate worship for all the blessings we enjoy from his bountiful hand.

MACEDON CENTER METHODIST Carl W. Hayes, Pastor Sunday, Aug. 24, 10 o'clock, morning worship, 11 o'clock, church school; lesson topic "The Better Covenant." Thursday evening, Aug. 28, the fourth quarterly conference of South Perinton and Macedon Center churches will be held at Macedon Center church at 8 o'clock.

UNION SUMMER SERVICE Penfield, N. Y. Worship hour at 10 o'clock in the Methodist church with Rev. Charles H. Schmitz of the Baptist church bringing the sermon on the theme "An Embarrassing Question." Both junior and senior choirs will sing. We cordially invite you to this last in the present series of union services sponsored by the Advent Christian church, the Methodist and Baptist churches of Penfield.

ST. JOHN'S EV. LUTHERAN Farmington L. G. Leonard, Pastor Divine services will be conducted in our church next Sunday morning at 8 o'clock. Rev. A. R. Sander of Mendon will preach the sermon. Sunday school and Bible class will follow the church service at 9:15.

SOUTH PERINTON METHODIST Rev. C. W. Hayes, Pastor Church school next Sunday at 11 o'clock, followed by the regular church worship service at 12 o'clock. A better attendance was noted last Sunday after a two weeks vacation for pastor and people.

On Tuesday evening at the home of Sara and Pearl Wilson a Sunday school board meeting will be held at 8 o'clock. Besides members of the board, teachers, officers, etc., Sara Wilson, Sunday school superintendent, states that any members of the school or those interested in the school would be most welcome to attend this meeting.

On Thursday evening, Aug. 28, the annual meeting and last quarterly conference will be held at Macedon Center. Dr. Bisgrove will be present to preside at the conference. All reports of the year's work of the church will be read at this time. All members of the church are invited.

Announcement was made last Sunday of the annual church service of Victor, Macedon Center and South Perinton Methodist churches to unite with Farmington Friends church on Aug. 31 at an outdoor meeting as previously held. More in detail will be announced later.

Cross Monihan The marriage of Miss Mary E. Monihan, daughter of Mrs. Mary Monihan of Fairport, to Richard G. Cross, son of Mr. and Mrs. Harry M. Cross of Elmendorf avenue, Rochester, took place Aug. 16, 1941 in the Church of the Assumption, Fairport. Rev. James T. Wood performed the ceremony.

The bride wore a costume suit of heather blue wool and a corsage of orchids. Her attendant was her sister, Miss Margaret Monihan, who wore a costume suit of cinnamon brown with a corsage of tallman roses. The best man was Raymond Sweeney of Rochester.

An informal reception was held at the home of the bride. The couple left for a trip through the New England states.

BABSON

Continued from page 1 as much importance to the nation as is the factory manager. This will be true for some years to come regardless of the time of the ending of World War II. The average reader has little conception of the size of U. S. agriculture as a business. U. S. farm products will have a value of at least \$10,500,000,000 in 1941 and our farms as of July 1 furnished employment for 11,769,000 individuals.

The wholesale value of our manufactured products for 1941 will be about \$70,000,000,000. This, of course, includes defense business. We are, however, very apt to reach a time when the value of our agricultural products will be very much higher than they are today.

The day may come when industrial products will be manufactured from different and cheaper materials and hence have a smaller value while the quantity of farm products used in manufacturing will result in a much higher importance as well as value being placed upon agriculture as a business. Many types of plastics are already being made from farm products. With the strides chemistry is making thousands of materials embraced in consumer goods will have their origin on the farm.

Conclusion Certainly the farmer can look forward to better days over the near term. The prosperity of the industrial areas is being felt in farming centers and mail order sales are reflecting the increased spending of our farm population. For the long pull a closer tie-up between agriculture and industry promises much. It may be that the increased development of our farming areas from an industrial point of view may do much to cushion the post-war slump.

The New York State College of Home Economics has studied the cooking qualities of potatoes for the past four years. Varieties sampled were Cobble, Green Mountain, Rural, and the two new varieties, Katahdin and Chippewa.

TEMPLE FAIRPORT, N. Y.

TONIGHT - 545 BIG REASONS TO ATTEND! - On the Screen - "A Woman's Face" - plus - "Wild Man of Borneo"

FRIDAY and SATURDAY, Aug. 22-23 Judy Canova ("Sis Hopkins") "PUDDIN' HEAD" - plus - Bill Elliott in "Beyond the Sacramento"

SUNDAY and MONDAY, Aug. 24-25 James Cagney and Bette Davis - in - "THE BRIDE CAME C. O. D." - 2nd Hit - Carole Landis Cesar Romero - in - "DANCE HALL" Extra! "3rd Dimensional Murder"

TUESDAY-WEDNESDAY-THURSDAY August 26-27-28 BSNK NITES Ida Lupino John Garfield - in - "OUT OF THE FOG" - plus - Jane Withers in "A VERY YOUNG LADY" Starts Sunday, August 31

"THEY MET IN BOMBAY"

RIALTO

FRIDAY and SATURDAY Fri. is Queen Mary China Nite Wallace Beery, Marjorie Main "BARNACLE BILL" - plus - BULLETS FOR O'HARA with Joan Perry, Roger Pryor 250 Comic Books Sat. Matinee Chap. 6 "Riders of Death Valley" 140 Reasons to Attend BSNK Saturday Nite

SUNDAY and MONDAY The Thrill Picture of the Year Clark Gable, Rosalind Russell - in - "THEY MET IN BOMBAY" - plus - Joan Bennett, Franchot Tone "SHE KNEW ALL THE ANSWERS"

TUESDAY-WEDNESDAY-THURSDAY are BSNK NIGHTS Merle Oberon, Melvyn Douglas - in - "THAT UNCERTAIN FEELING" - plus - Frank Morgan, Billie Burke in "THE WILD MAN FROM BORNEO" Sunday, August 31 "MOON OVER MIAMI"

FOR A WEALTH OF Flavor - make your salads with this top quality dressing. Contains more egg yolk and oil - the costly ingredients - but costs you less because A&P both makes and sells it! ANN PAGE Salad Dressing 29c

More Ann Page Values Assorted Pure Fruit Preserves 2 lb jar 29c Pound jar 17c Mustard 9 oz jar 8c Beans 4 1-lb cans 27c Sandwich Spread Pint jar 21c Sparkle Gelatins 3 pkgs 11c Sparkle Puddings 7 pkgs 11c Peanut Butter 2 lb jar 29c Spaghetti 4 1 1/2% oz. cans 27c

Compare These Values! Jane Parker - Golden Marble, or Iced Silver Pound Cake Each 23c Sunnyfield-Creamery Tub Butter lb 38c Tomato Catsup 14 oz brl 10c Pastry Flour Sunnyfield 2 1/2 lb sack 69c Cake Flour Sunnyfield 2 1/2 lb box 15c Wheat Puffs or RICE PUFFS Sunnyfield reg pkg 5c

Heinz Baby Foods 3 cans 23c Clapp's Baby Foods 3 cans 23c Beef Hash Silver Skillet lb can 15c Kennel Feed "Daily" 5 lb bag 27c Fels-Naphtha-Chips 1 lb box 21c Mazola Oil Pint can 29c Octagon Soap Powder pkg 5c Klek Soap Powder for Washing Dishes 1 lb box 18c Gauze Tissue Lined 3 rolls 13c

Fresh Fruits & Vegetables! Cantaloupes Sweet Ripe "Heart o' Gold" Contains Vitamins A-C 2 for 19c Fresh Peas Vitamins A-B-C-G 2 lbs 17c Bananas Golden Ripe-Vitamins A-B-C 4 lbs 29c Potatoes Locally Grown-Vitamins B-C 15 lbs 27c Sweet Potatoes 5 lbs 25c Yellow Onions 5 lb bag 13c Green Peppers 4 for 10c Persian Limes Carton of Five 13c Fresh Beets 2 bchs 7c Cooking Apples 5 lbs 19c Concentrated Super Suds For the Laundry 2 1/2 lb boxes 41c

Quality Guaranteed A&P Meat! Fancy Grade-to Fricassee or Stew! Fancy Fowl 3 1/2 lb. Size Contains Vitamins B-G lb. 25c Chuck Roast lb. 21c Sunnyfield-Whole or String Half-Vitamins B-G Cooked Ham lb 33c Ground Beef Freshly Ground lb 21c Sliced Bologna lb 25c Skinless Wieners lb 25c Lamb Patties lb 27c Sliced Bacon lb 27c FRESH KILLED Broilers lb. 27c Fancy Sea Food Fancy Haddock Fillets lb 19c Sliced Halibut lb 25c Mackerel 2 lbs 17c Yellow Pike lb 23c Lake Perch lb 10c A&P FOOD STORES

Becoming glasses are a fashionable accessory, as well as an aid to vision. We've all the lens shapes and frame styles smart for Back to College. Styles for casual and styles for dance time wear. H. H. PULVER Optometrist East Rochester, N. Y. 304 Main St. Phone 433 M

on the way TO SCHOOL The small fry wend their way to school in snazzy looking shoes that help young feet grow straight and strong. 1.39 to 3.50 All Shoes X-Ray Fitted King's Shoe Store 110 E. Commercial St. East Rochester
